# Supplementary material for: Multi-factorial modulation of colorectal carcinoma cells motility – partial coordination by the tetraspanin Co-029/tspan8
Source: PubMed Central journal article supplement (PMC5432348; doi:10.18632/oncotarget.16247), 2017-03-16
Supplement: oncotarget-08-27454-s001.pdf [file oncotarget-08-27454-s001.pdf]

## Multi-factorial modulation of colorectal carcinoma cells motility – partial coordination by the tetraspanin Co-029/tspan8

### SUPPLEMENTARY MATERIALS

### SUPPLEMENTARY FIGURES, MOVIES AND TABLES

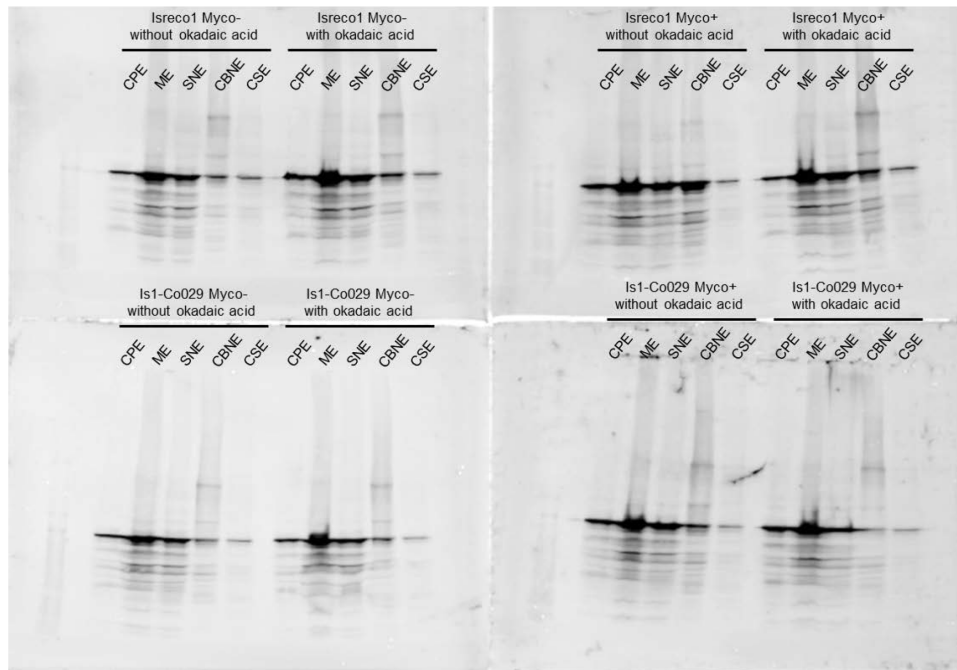

**Supplementary Figure 1: Subcellular localization of p65NFkB.** Western blot with an anti-p65NFkB mouse monoclonal antibody revealed by a goat anti-mouse (Alexa Fluor 800 nm) of subcellular protein extracts from Isreco1 and Is1-Co029 cells, either mycoplasma infected (Mycoplasm+) or free (Mycoplasm-) and incubated or not with okadaic acid (10 nM). Cytoplasmic (CPE), membrane (ME), soluble nuclear (SNE), chromatin-bound (CBNE) and cytoskeletal (CSE) protein extracts were tested in the different conditions. All cells were cultured on a collagen I substrate.

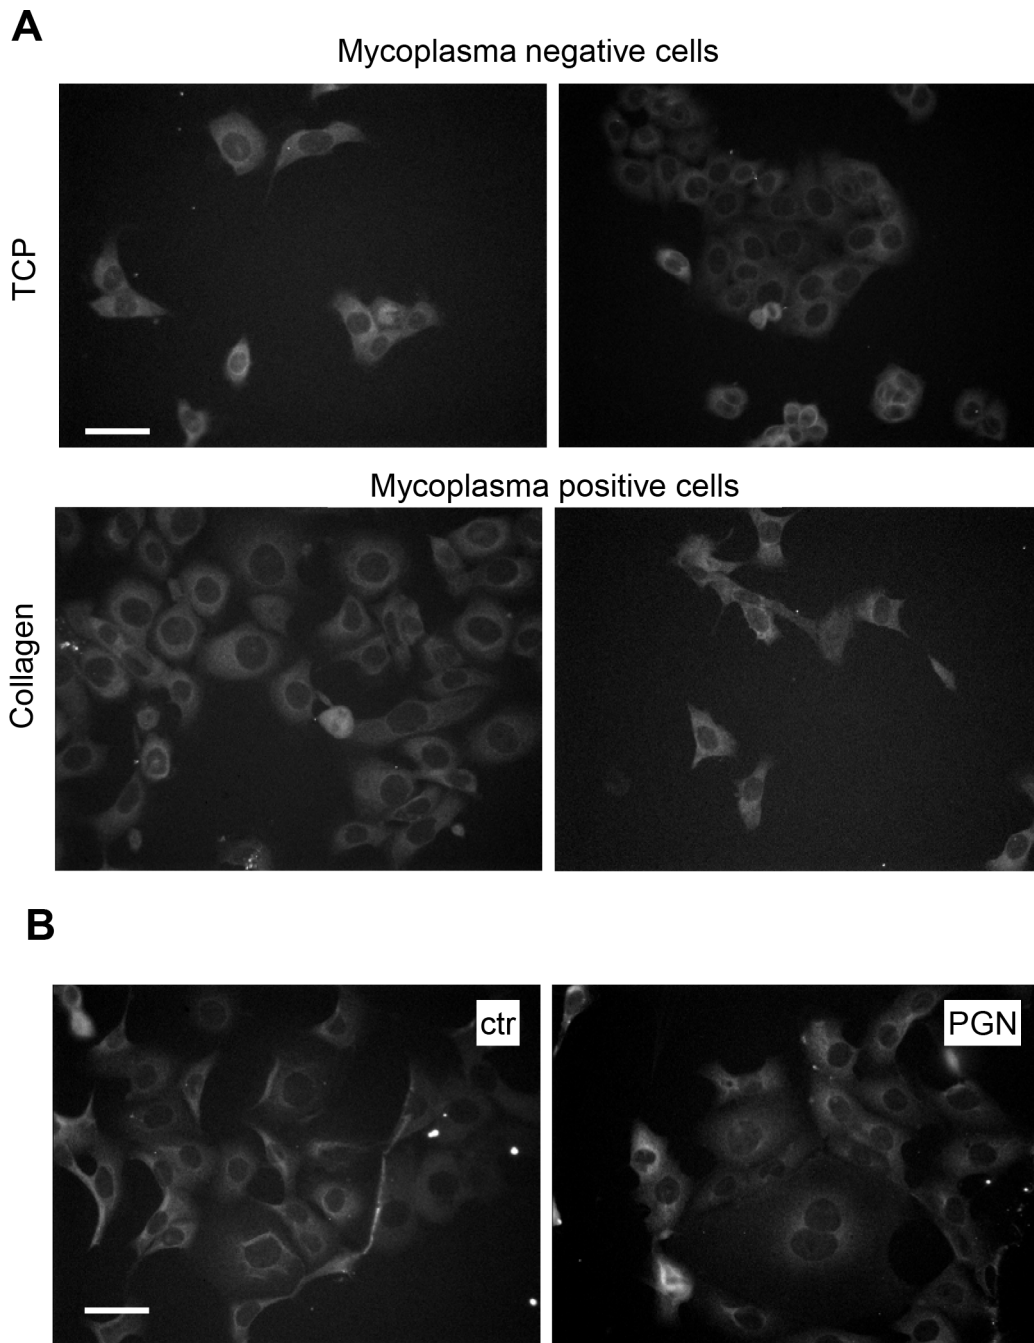

**Supplementary Figure 2: p65NFkB cellular localization in Is1-Co029 cells. (A)** p65NFkB remains cytoplasmic independently of mycoplasma status or addition of a collagen I. **(B)** The TLR2 ligand PGN does not induce the translocation of p65NFkB to the nucleus. Scale bar 50µm.

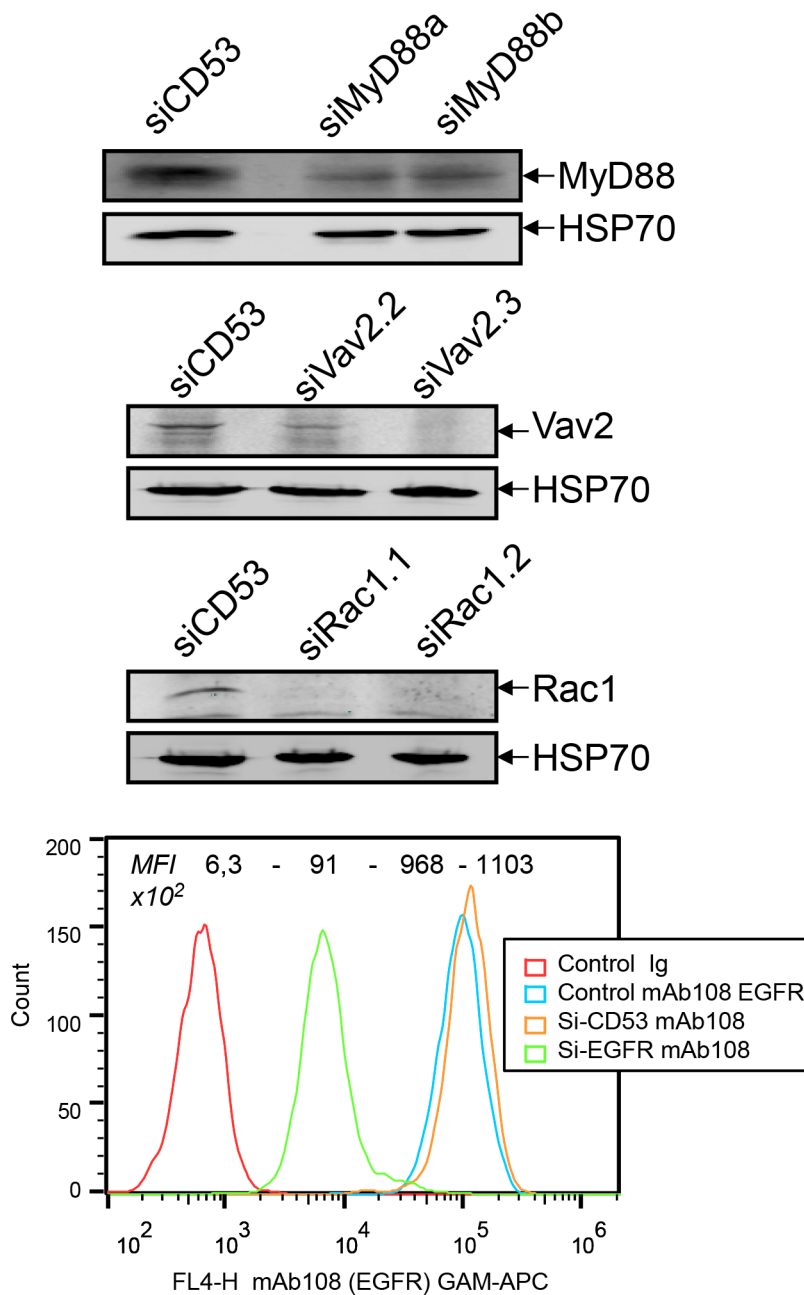

Supplementary Figure 3: Efficiency on protein expression of siRNA to MyD88, Vav2, Rac1 (western blot) and to EGFR (flow cytometry).

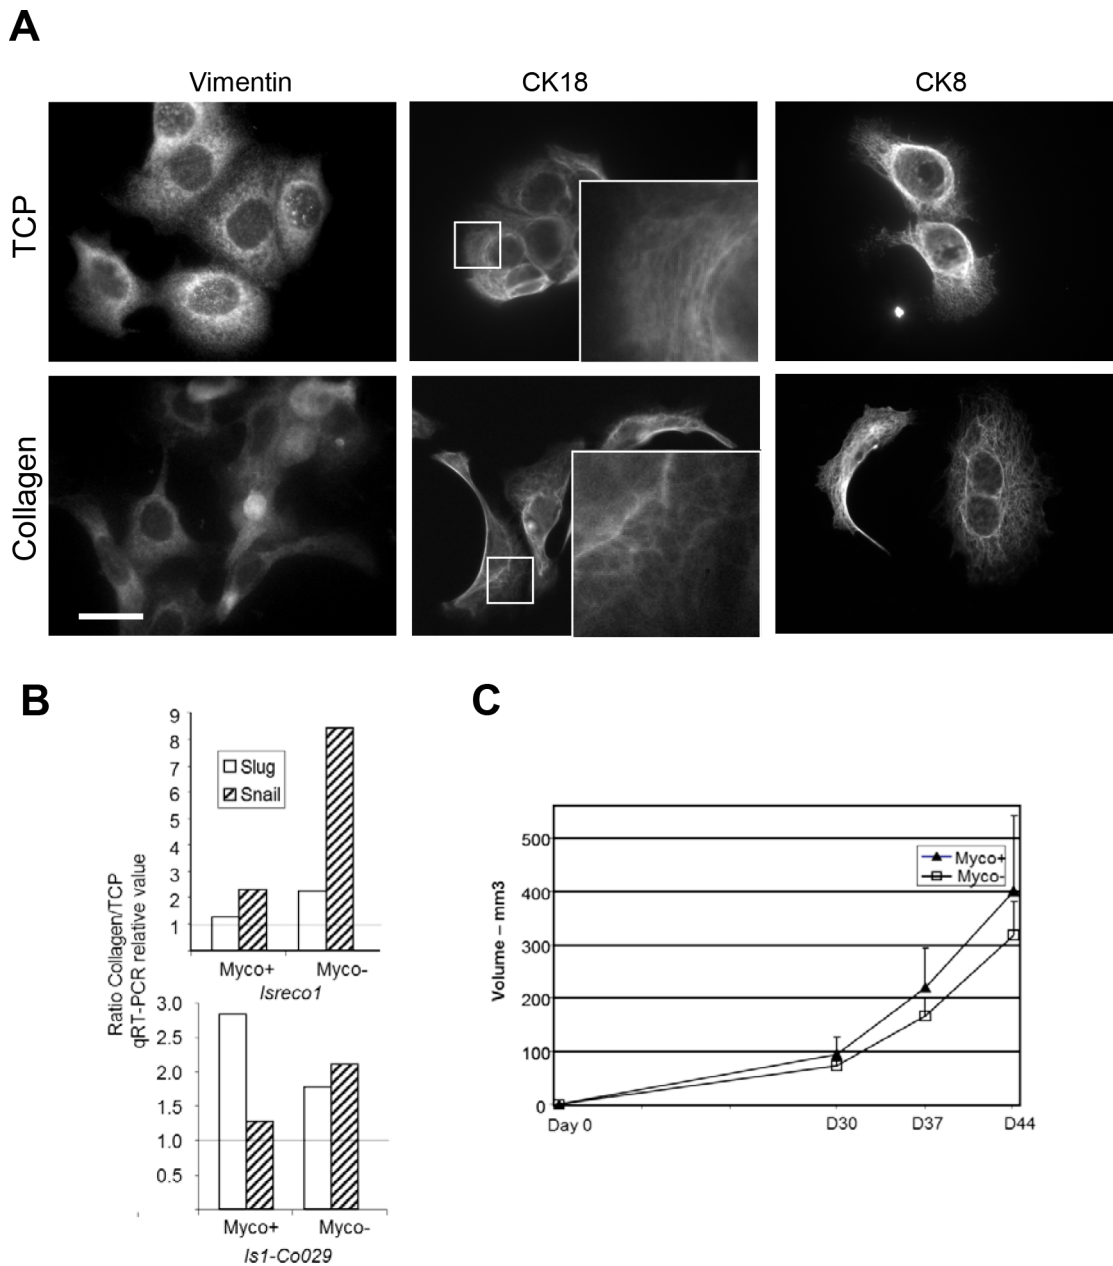

**Supplementary Figure 4: EMT markers and *in vivo* tumor growth in relation to mycoplasma infection.** (A) Effect of collagen on intermediate filaments expression of Isreco 1 cells (mycoplasma infected). Despite differences in cell morphology of cells cultured on collagen I compared to TCP (tissue culture plastic), vimentin labeling remains diffuse and punctuate whereas cytokeratins 8 and 18 are still strongly expressed with a fibrillar aspect (magnified in the insert of CK18 pictures). Scale bar 25µm. (B) Slug and Snail mRNA expression in Isreco cells. Mycoplasma infected (Myco+) or free (Myco-) cells were cultured with or without substrate. Results are shown as ratio of collagen vs TCP relative amounts. Culture on collagen induces a variable increase of Slug and Snail mRNA. (C) The *in vivo* growth of tumors is not significantly modified by the presence (Myco+) or absence (Myco-) of mycoplasma in subcutaneously injected SW480 cells.

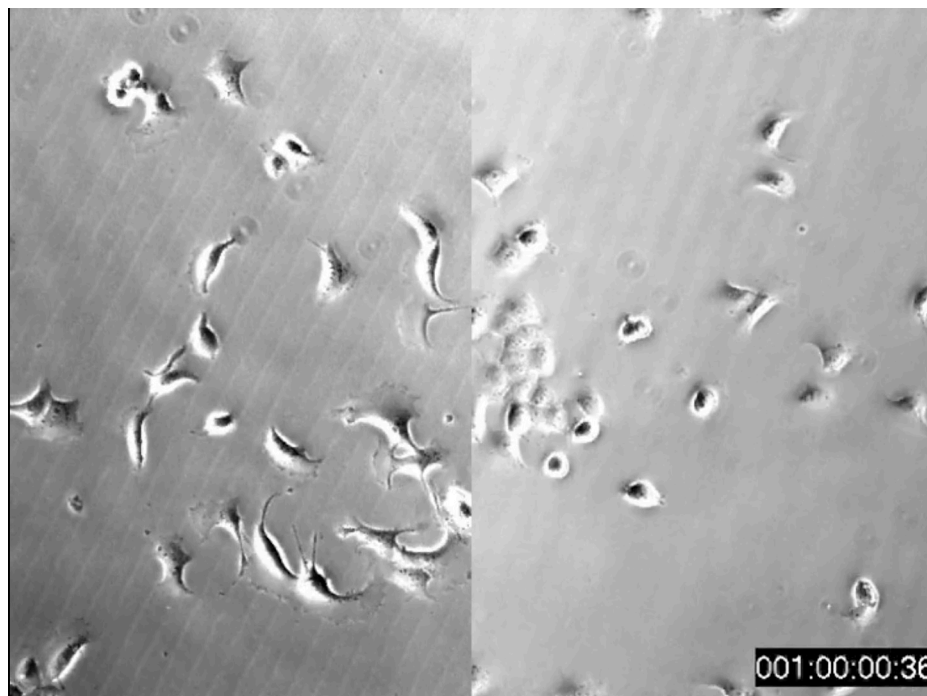

**Supplementary Movie 1:** This file contains Supplementary Movie 1 showing side by side comparison of cell motility on collagen I of Isreco1 cells infected by mycoplasma (left) and cells treated with BM-Cyclin (checked for the absence of mycoplasma) (right). Mycoplasma infected cells move rapidly with an elongated arc or fan shape whereas mycoplasma free cells move only slightly and as a consequence remain together upon division.

See Supplementary Movie 1

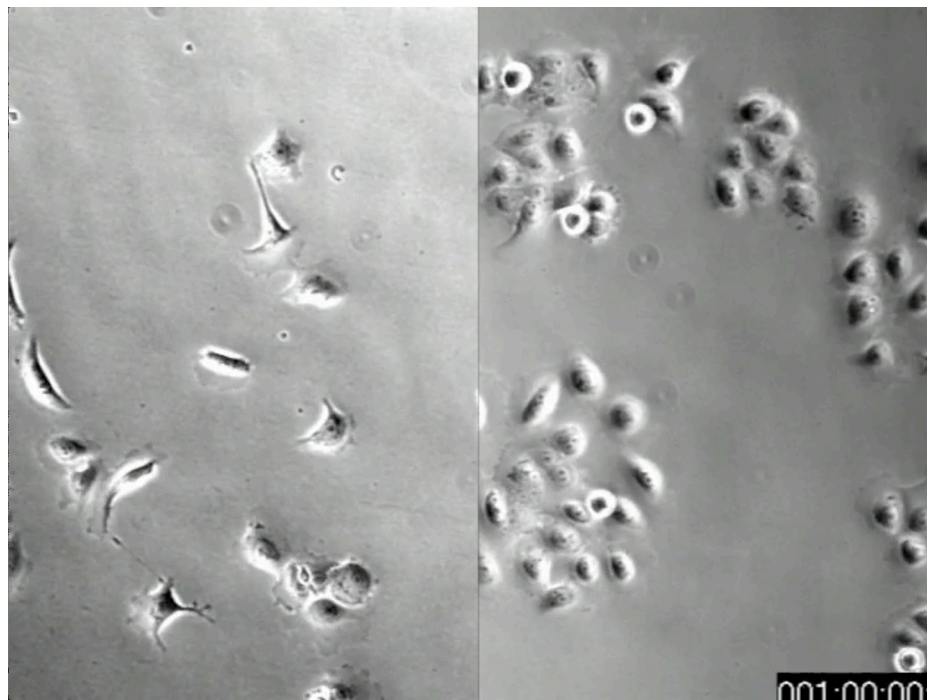

**Supplementary Movie 2:** This file contains Supplementary Movie 2 showing side by side comparison of cell motility of mycoplasma free Isreco1 cells with PGN (a lipopeptide from the mycoplasma membrane) (left) and without PGN (right). PGN induces cell motility of mycoplasma free cells on collagen I.

See Supplementary Movie 2

**Supplementary Table 1: Seventeen Mycoplasma hyorhinis proteins found by MS analysis as contaminants of tetraspanins complexes immunoprecipitates**

| Accession | Description                                | Mycoplasma<br>hyorhinis strain | Coverage | #Unique<br>Peptides | #Peptides | #PSMs | S-Area   | AAs  | MW<br>[kDa] |
|-----------|--------------------------------------------|--------------------------------|----------|---------------------|-----------|-------|----------|------|-------------|
| E0TK89    | Uncharacterized lipoprotein                | strain HUB-1                   | 52,79    | 11                  | 38        | 61    | 1,66E+08 | 771  | 88          |
| K7X9H3    | High affinity transport system protein p37 | SK76                           | 49,88    | 6                   | 20        | 30    | 2,05E+08 | 403  | 46          |
| E0TLD6    | Uncharacterized protein                    | strain HUB-1                   | 23,68    | 5                   | 14        | 17    | 6,61E+07 | 722  | 83          |
| K7X8P8    | Cytosol aminopeptidase pepA                | SK76                           | 36,68    | 5                   | 12        | 14    | 3,32E+07 | 458  | 51          |
| E0TLG9    | Uncharacterized protein                    | strain HUB-1                   | 13,62    | 4                   | 10        | 14    | 1,07E+08 | 947  | 109         |
| K7X8S8    | ABC transporter xylose-binding lipoprotein | SK76                           | 38,41    | 4                   | 14        | 21    | 5,35E+07 | 453  | 50          |
| K7XZ32    | Enolase                                    | SK76                           | 29,11    | 4                   | 8         | 9     | 2,63E+07 | 450  | 49          |
| E0TK90    | Uncharacterized lipoprotein                | strain HUB-1                   | 28,95    | 3                   | 20        | 23    | 4,52E+07 | 753  | 85          |
| E0TKQ5    | 46kDa surface antigen                      | strain HUB-1                   | 27,07    | 3                   | 11        | 16    | 6,53E+07 | 447  | 49          |
| E0TL59    | 101 kDa protein                            | strain HUB-1                   | 8,72     | 3                   | 8         | 8     | 4,10E+07 | 1044 | 119         |
| K7X3C4    | Uncharacterized protein                    | SK76                           | 26,96    | 3                   | 5         | 5     | 2,92E+07 | 230  | 26          |
| E0TKF0    | Phosphoglycerate kinase                    | strain HUB-1                   | 49,25    | 2                   | 13        | 14    | 6,78E+07 | 402  | 44          |
| E0TL30    | ATP synthase subunit b                     | strain HUB-1                   | 26,46    | 2                   | 5         | 5     | 8,13E+06 | 189  | 22          |
| E0TLN9    | Uncharacterized protein                    | strain HUB-1                   | 19,86    | 2                   | 15        | 18    | 6,67E+07 | 851  | 96          |
| K7X1Y7    | Uncharacterized protein                    | SK76                           | 13,03    | 2                   | 3         | 4     | 1,64E+07 | 284  | 32          |
| K7X314    | Uncharacterized protein                    | SK76                           | 19,86    | 2                   | 15        | 15    | 8,94E+07 | 851  | 96          |
| K7X915    | Uncharacterized protein                    | SK76                           | 15,86    | 2                   | 12        | 12    | 1,32E+07 | 946  | 108         |

**Supplementary Table 2: Integrins chains found by mass spectrometry analysis in the tetraspanin complexes of Isreco1 and Is1-Co029 cells cultured either on tissue culture plastic or on collagen I after CD9 (Ts9 mAb) or Co-029/ Tspan8 (Ts29.2 mAb) immunoprecipitation (IP)**

| Substrate        | Tissue Culture Plastic |        |          |                  |        |          |                    |        |          | Collagen I     |        |                  |        |                    |          |    |    |          |
|------------------|------------------------|--------|----------|------------------|--------|----------|--------------------|--------|----------|----------------|--------|------------------|--------|--------------------|----------|----|----|----------|
|                  | Isreco1 IP CD9         |        |          | Is1-Co029 IP CD9 |        |          | Is1-Co029 IP Co029 |        |          | Isreco1 IP CD9 |        | Is1-Co029 IP CD9 |        | Is1-Co029 IP Co029 |          |    |    |          |
|                  | Peptides               |        | S-Area   | Peptides         |        | S-Area   | Peptides           |        | S-Area   | Peptides       | S-Area | Peptides         | S-Area | Peptides           | S-Area   |    |    |          |
|                  | Total                  | Unique |          | Total            | Unique |          | Total              | Unique |          | Total          | Unique | Total            | Unique | Total              | Unique   |    |    |          |
| Integrins Chains |                        |        |          |                  |        |          |                    |        |          |                |        |                  |        |                    |          |    |    |          |
| ITGA2            |                        |        |          | 2                | 1      | 8,88E+05 | 6                  | 1      | 9,13E+06 | 3              | 1      | 4,44E+06         | 2      | 1                  | 2,39E+06 |    |    |          |
| ITGA3            | 4                      | 2      | 6,37E+08 | 5                | 1      | 1,56E+09 | 31                 | 18     | 1,04E+09 | 23             | 14     | 1,56E+09         | 23     | 13                 | 1,89E+09 | 19 | 10 | 4,18E+08 |
| ITGA6            | 6                      | 1      | 2,40E+08 | 12               | 3      | 3,33E+08 | 28                 | 14     | 1,69E+08 | 33             | 15     | 4,77E+08         | 41     | 21                 | 3,50E+08 | 29 | 12 | 7,62E+07 |
| ITGAV            | 1                      | 1      | 2,70E+06 | 12               | 6      | 2,63E+07 | 17                 | 5      | 1,30E+07 |                |        |                  | 8      | 3                  | 1,03E+07 | 14 | 4  | 1,07E+07 |
| ITGB1            | 15                     | 7      | 2,77E+09 | 33               | 18     | 3,07E+09 | 33                 | 19     | 1,72E+09 | 29             | 18     | 2,72E+09         | 28     | 17                 | 3,03E+09 | 27 | 16 | 2,43E+09 |
| ITGB4            | 9                      | 2      | 1,65E+08 | 4                | 1      | 3,27E+08 | 19                 | 9      | 9,86E+07 | 39             | 21     | 4,28E+08         | 30     | 19                 | 4,19E+08 | 35 | 18 | 1,25E+08 |
| ITGB5            |                        |        |          | 2                | 1      | 3,95E+06 | 7                  | 2      | 1,82E+07 |                |        |                  |        |                    |          | 8  | 1  | 7,96E+06 |
| ITGB8            |                        |        |          |                  |        |          |                    |        |          |                |        |                  |        |                    |          | 4  | 1  | 3,90E+06 |
